# Supplementary material
Source: publisher site journal article supplement (https://www.dovepress.com/article/401685)
Supplement: Supplementary file 1 [file get_supplementary_file.php]

## Supplementary file. Search strategy

### 1.1 Medline (Medline)

| Step | Search strategy                                                                                                                                                                                                                                                                                                                                                                                                                                                                                                                                                 | References |
|------|-----------------------------------------------------------------------------------------------------------------------------------------------------------------------------------------------------------------------------------------------------------------------------------------------------------------------------------------------------------------------------------------------------------------------------------------------------------------------------------------------------------------------------------------------------------------|------------|
| 1    | ((((MH "Patients+") OR TI (patient* OR subject* OR participant* OR client* OR inpatient* OR outpatient*) OR AB (patient* OR subject* OR participant* OR client* OR inpatient* OR outpatient*)) AND ((MH "Health Personnel+") OR TI (provider* OR doctor* OR physician* OR specialist* OR nurs* OR psychiatrist* OR therapist* OR psychologist* OR "physical therapist*" OR physiotherapist*) OR AB (provider* OR doctor* OR physician* OR specialist* OR nurs* OR psychiatrist* OR therapist* OR psychologist* OR "physical therapist*" OR physiotherapist*)))  | 782551     |
| 2    | (MH "Professional-Patient Relations+") OR (MH "Therapeutic Alliance") OR TI ("therapeutic alliance*" OR discuss* OR communicat* OR interact* OR conversation* OR reassur* OR tell OR told OR consultat* OR consult OR explan* OR disrespect* OR dismiss* OR relation* OR instruct* OR advis* OR counsel* OR talk*) OR AB ("therapeutic alliance*" OR discuss* OR communicat* OR interact* OR conversation* OR reassur* OR tell OR told OR consultat* OR consult OR explan* OR disrespect* OR dismiss* OR relation* OR instruct* OR advis* OR counsel* OR talk*) | 5606807    |
| 3    | (MH "Pain, Postoperative+") OR TI (pain* N6 (postoperative OR "post-operative" OR "following surgery" OR "following operation*" OR perioperative OR postprocedur* OR "postprocedur*" OR "after surgery" OR "after operation*" OR "postsurgical" OR postsurg* OR "post-surg*")) OR AB (pain* N6 (postoperative OR "post-operative" OR "following surgery" OR "following operation*" OR perioperative OR postprocedur* OR "postprocedur*" OR "after surgery" OR "after operation*" OR "postsurgical" OR postsurg* OR "post-surg*"))                               | 76851      |
| 4    | S1 AND S2 AND S3                                                                                                                                                                                                                                                                                                                                                                                                                                                                                                                                                | 1044       |

## 1.2 PsycInfo (EBSCO)

| Step | Search strategy                                                                                                                                                                                                                                                                                                                                                                                                                                                                                                                                                                                                                                                                                                                                                                                                                     | References |
|------|-------------------------------------------------------------------------------------------------------------------------------------------------------------------------------------------------------------------------------------------------------------------------------------------------------------------------------------------------------------------------------------------------------------------------------------------------------------------------------------------------------------------------------------------------------------------------------------------------------------------------------------------------------------------------------------------------------------------------------------------------------------------------------------------------------------------------------------|------------|
| 1    | ((DE "Patients" OR DE "Geriatric Patients" OR DE "Hospitalized Patients" OR DE "Medical Patients" OR DE "Outpatients" OR DE "Psychiatric Patients" OR DE "Surgical Patients") OR TI (patient* OR subject* OR participant* OR client* OR inpatient* OR outpatient*) OR AB (patient* OR subject* OR participant* OR client* OR inpatient* OR outpatient*)) AND ((DE "Health Personnel" OR DE "Allied Health Personnel" OR DE "Caregivers" OR DE "Medical Personnel" OR DE "Mental Health Personnel") OR TI (provider* OR doctor* OR physician* OR specialist* OR nurs* OR psychiatrist* OR therapist* OR psychologist* OR "physical therapist*" OR physiotherapist*) OR AB (provider* OR doctor* OR physician* OR specialist* OR nurs* OR psychiatrist* OR therapist* OR psychologist* OR "physical therapist*" OR physiotherapist*)) | 266347     |
| 2    | (DE "Therapeutic Alliance") OR TI ("therapeutic alliance*" OR discuss* OR communicat* OR interact* OR conversation* OR reassur* OR tell OR told OR consultat* OR consult OR explan* OR disrespect* OR dismiss* OR relation* OR instruct* OR advis* OR counsel* OR talk*) OR AB ("therapeutic alliance*" OR discuss* OR communicat* OR interact* OR conversation* OR reassur* OR tell OR told OR consultat* OR consult OR explan* OR disrespect* OR dismiss* OR relation* OR instruct* OR advis* OR counsel* OR talk*)                                                                                                                                                                                                                                                                                                               | 2385789    |
| 3    | TI (pain* N6 (postoperative OR "post-operative" OR "following surgery" OR "following operation*" OR perioperative OR postprocedur* OR "postprocedur*" OR "after surgery" OR "after operation*" OR "postsurgical" OR postsurg* OR "post-surg*")) OR AB (pain* N6 (postoperative OR "post-operative" OR "following surgery" OR "following operation*" OR perioperative OR postprocedur* OR "postprocedur*" OR "after surgery" OR "after operation*" OR "postsurgical" OR postsurg* OR "post-surg*"))                                                                                                                                                                                                                                                                                                                                  | 2519       |
| 4    | S1 AND S2 AND S3                                                                                                                                                                                                                                                                                                                                                                                                                                                                                                                                                                                                                                                                                                                                                                                                                    | 162        |

## 1.3 Cinahl (EBSCO)

| Step | Search strategy                                                                                                                                                                                                                                                                                                                                                                                                                                                                                                                                                 | References |
|------|-----------------------------------------------------------------------------------------------------------------------------------------------------------------------------------------------------------------------------------------------------------------------------------------------------------------------------------------------------------------------------------------------------------------------------------------------------------------------------------------------------------------------------------------------------------------|------------|
| 1    | ((MH "Patients+") OR TI (patient* OR subject* OR participant* OR client* OR inpatient* OR outpatient*) OR AB (patient* OR subject* OR participant* OR client* OR inpatient* OR outpatient*)) AND ((MH "Health Personnel+") OR TI (provider* OR doctor* OR physician* OR specialist* OR nurs* OR psychiatrist* OR therapist* OR psychologist* OR "physical therapist*" OR physiotherapist*) OR AB (provider* OR doctor* OR physician* OR specialist* OR nurs* OR psychiatrist* OR therapist* OR psychologist* OR "physical therapist*" OR physiotherapist*))     | 514989     |
| 2    | (MH "Professional-Patient Relations+") OR (MH "Therapeutic Alliance") OR TI ("therapeutic alliance*" OR discuss* OR communicat* OR interact* OR conversation* OR reassur* OR tell OR told OR consultat* OR consult OR explan* OR disrespect* OR dismiss* OR relation* OR instruct* OR advis* OR counsel* OR talk*) OR AB ("therapeutic alliance*" OR discuss* OR communicat* OR interact* OR conversation* OR reassur* OR tell OR told OR consultat* OR consult OR explan* OR disrespect* OR dismiss* OR relation* OR instruct* OR advis* OR counsel* OR talk*) | 1417833    |
| 3    | (MH "Postoperative Pain") OR TI (pain* N6 (postoperative OR "post-operative" OR "following surgery" OR "following operation*" OR perioperative OR postprocedur* OR "postprocedur*" OR "after surgery" OR "after operation*" OR "postsurgical" OR postsurg* OR "post-surg*")) OR AB (pain* N6 (postoperative OR "post-operative" OR "following surgery" OR "following operation*" OR perioperative OR postprocedur* OR "postprocedur*" OR "after surgery" OR "after operation*" OR "postsurgical" OR postsurg* OR "post-surg*"))                                 | 28540      |
| 4    | S1 AND S2 AND S3                                                                                                                                                                                                                                                                                                                                                                                                                                                                                                                                                | 809        |

## 1.4 Cochrane Library

| Step | Search strategy                                                                                                                                                                                                                                        | References |
|------|--------------------------------------------------------------------------------------------------------------------------------------------------------------------------------------------------------------------------------------------------------|------------|
| 1    | ((patient* OR subject* OR participant* OR client* OR inpatient* OR outpatient*) AND (provider* OR doctor* OR physician* OR specialist* OR nurs* OR psychiatrist* OR therapist* OR psychologist* OR "physical therapist" OR physiotherapist*)):ti,ab,kw | 19908      |
| 2    | (("therapeutic alliance" OR discuss* OR communicat* OR interact* OR conversation* OR reassur* OR tell OR told OR consultat* OR consult OR explan* OR disrespect* OR dismiss* OR relation* OR instruct* OR advis* OR counsel* OR talk*)):ti,ab,kw       | 325389     |
| 3    | ((pain* NEAR/6 (postoperative OR "post-operative" OR "following surgery")) OR (pain* NEAR/6 ("following operation" OR perioperative OR postprocedur*)) OR (pain* NEAR/6 ("post-procedure" OR "post-procedural" OR "after surgery"))):ti,ab,kw          | 70279      |
| 4    | ((pain* NEAR/6 "after operation") OR (pain* NEAR/6 "post-surgical") OR (pain* NEAR/6 postsurg*) OR (pain* NEAR/3 "post-surgery")):ti,ab,kw                                                                                                             | 2124       |
| 5    | #1 AND #2 AND (#3 OR #4)                                                                                                                                                                                                                               | 292        |

## 1.4 Embase (Elsevier)

| Step | Search strategy                                                                                                                                                                                                                                                                                                                                                                                                                                                | References |
|------|----------------------------------------------------------------------------------------------------------------------------------------------------------------------------------------------------------------------------------------------------------------------------------------------------------------------------------------------------------------------------------------------------------------------------------------------------------------|------------|
| 1    | ('patient'/exp OR patient*:ti,ab OR subject*:ti,ab OR participant*:ti,ab OR client*:ti,ab OR inpatient*:ti,ab OR outpatient*:ti,ab) AND ('health care personnel'/exp OR provider*:ti,ab OR doctor*:ti,ab OR physician*:ti,ab OR specialist*:ti,ab OR nurs*:ti,ab OR psychiatrist*:ti,ab OR therapist*:ti,ab OR psychologist*:ti,ab OR 'physical therapist*':ti,ab OR physiotherapist*:ti,ab)                                                                   | 1744347    |
| 2    | 'professional-patient relationship'/exp OR 'therapeutic alliance'/exp OR 'therapeutic alliance*':ti,ab OR 'interpersonal communication'/exp OR discuss*:ti,ab OR communicat*:ti,ab OR interact*:ti,ab OR conversation*:ti,ab OR reassur*:ti,ab OR tell:ti,ab OR told:ti,ab OR consultat*:ti,ab OR consult:ti,ab OR explan*:ti,ab OR disrespect*:ti,ab OR dismiss*:ti,ab OR relation*:ti,ab OR instruct*:ti,ab OR advis*:ti,ab OR counsel*:ti,ab OR talk*:ti,ab | 7689195    |
| 3    | 'postoperative pain'/exp OR ((pain* NEAR/6 (postoperative OR 'post-operative' OR 'following surgery' OR 'following operation*' OR perioperative OR postprocedur* OR 'post-procedur*' OR 'after surgery' OR 'after operation*' OR 'post-surgical' OR postsurg* OR 'post-surg*')):ti,ab)                                                                                                                                                                         | 115026     |
| 4    | #1 AND #2 AND #3                                                                                                                                                                                                                                                                                                                                                                                                                                               | 3904       |
| 5    | #4 AND 'human'/de                                                                                                                                                                                                                                                                                                                                                                                                                                              | 3743       |
| 6    | #4 AND 'human'/de AND ('article'/it OR 'article in press'/it OR 'conference paper'/it OR 'conference review'/it OR 'editorial'/it OR 'letter'/it OR 'review'/it OR 'short survey'/it)                                                                                                                                                                                                                                                                          | 2008       |

## 1.5 Web of Science

| Step | Search strategy                                                                                                                                                                                                                                         | References |
|------|---------------------------------------------------------------------------------------------------------------------------------------------------------------------------------------------------------------------------------------------------------|------------|
| 1    | (TS=(patient* OR subject* OR participant* OR client* OR inpatient* OR outpatient*) ) AND (TS=(provider* OR doctor* OR physician* OR specialist* OR nurs* OR psychiatrist* OR therapist* OR psychologist* OR "physical therapist*" OR physiotherapist*)) | 657391     |
| 2    | TS=("therapeutic alliance*" OR discuss* OR communicat* OR interact* OR conversation* OR reassur* OR tell OR told OR consultat* OR consult OR explan* OR disrespect* OR dismiss* OR relation* OR instruct* OR advis* OR counsel* OR talk*)               | 12572088   |
| 3    | TS=(pain* NEAR/6 (postoperative OR "post-operative" OR "following surgery" OR "following operation*" OR perioperative OR postprocedur* OR "post-procedur*" OR "after surgery" OR "after operation*" OR "post-surgical" OR postsurg* OR "post-surg*"))   | 53599      |
| 4    | #3 AND #2 AND #1 AND                                                                                                                                                                                                                                    | 933        |
